# Supplementary material for: Restructuring of a Peat in Interaction with Multivalent Cations: Effect of Cation Type and Aging Time
Source: PLOS journal article supplement (doi:10.1371/journal.pone.0065359), 2013-06-04
Supplement: S1 (10.1371/journal.pone.0065359.s001) [file journal.pone.0065359.s001]

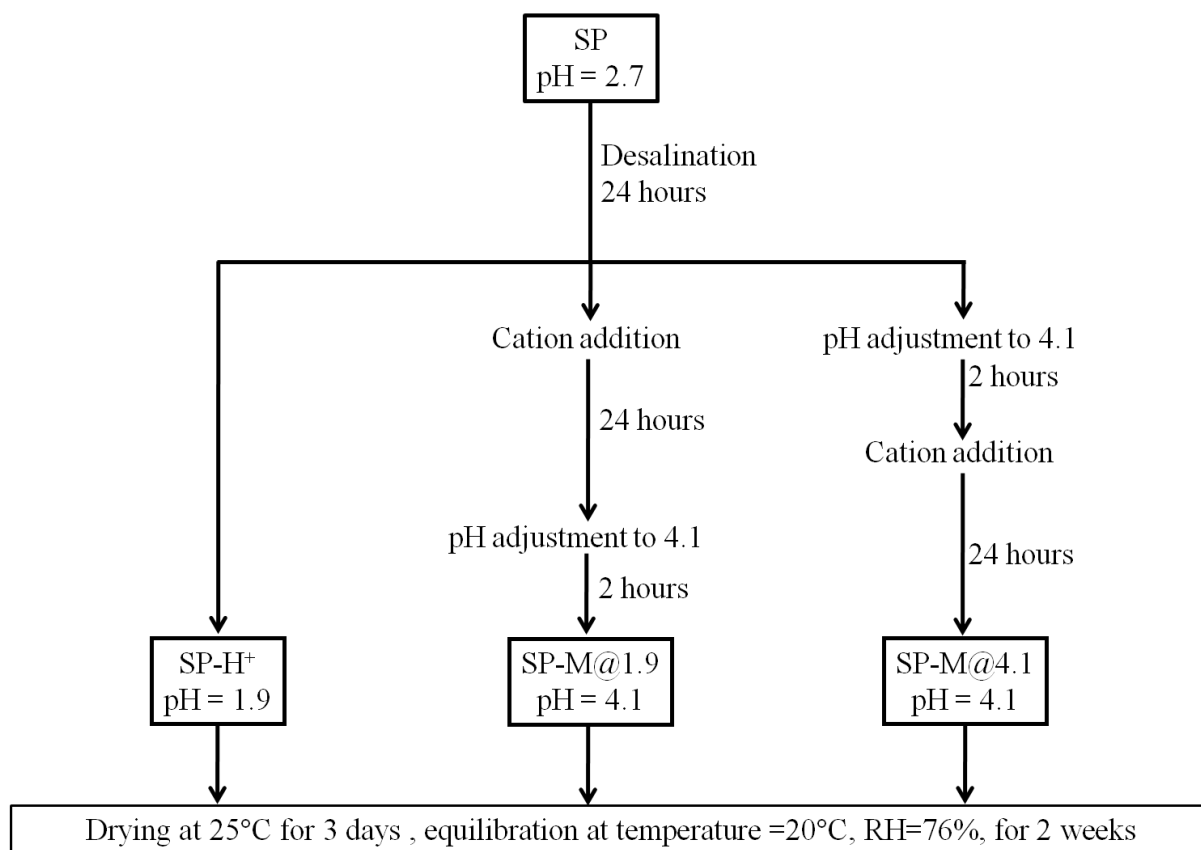

**Figure S1.** Schematic diagram describing the experimental procedure adopted for treatment of peat with exchange resin and with different cations.
