# Supplementary material for: Restructuring of a Peat in Interaction with Multivalent Cations: Effect of Cation Type and Aging Time
Source: PLOS journal article supplement (doi:10.1371/journal.pone.0065359), 2013-06-04
Supplement: S5 (10.1371/journal.pone.0065359.s005) [file redirect.do]

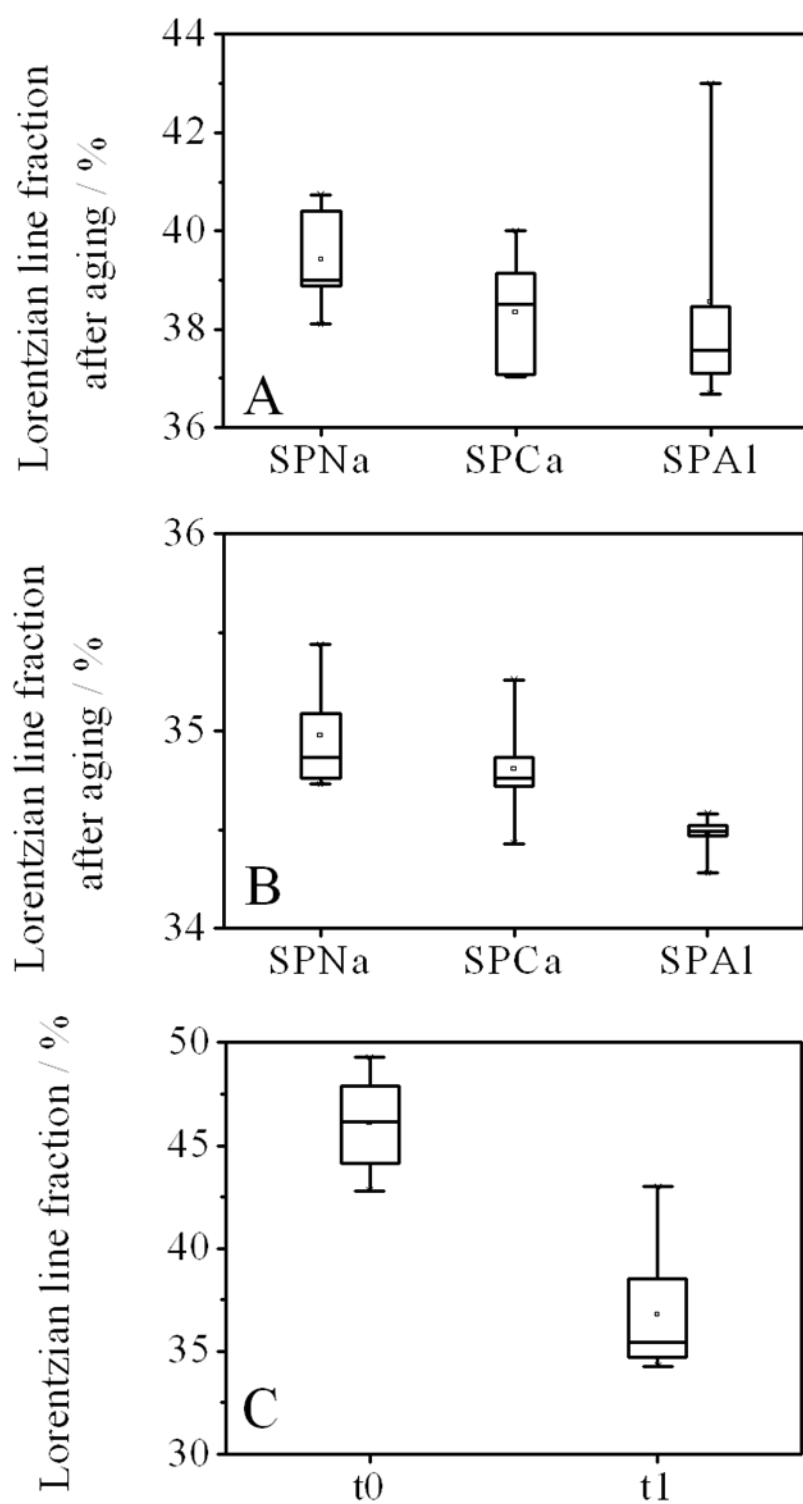

**Figure S5.** Lorentzian line fraction of  $^1\text{H}$  wideline (amount of mobile water) after aging, shown with respect to cation types for SP-M@1.9 (A) and for SP-M@4.1 (B). Lorentzian line fraction for all the treated samples before (t0) and after (t1) aging are shown in (C).
